# Supplementary material for: Characterization of Salmonella Isolates Recovered from Stages of the Processing Lines at Four Broiler Processing Plants in Trinidad and Tobago
Source: MDPI journal article supplement (doi:10.3390/microorganisms9051048), 2021-05-13
Supplement: s1 [file s1]

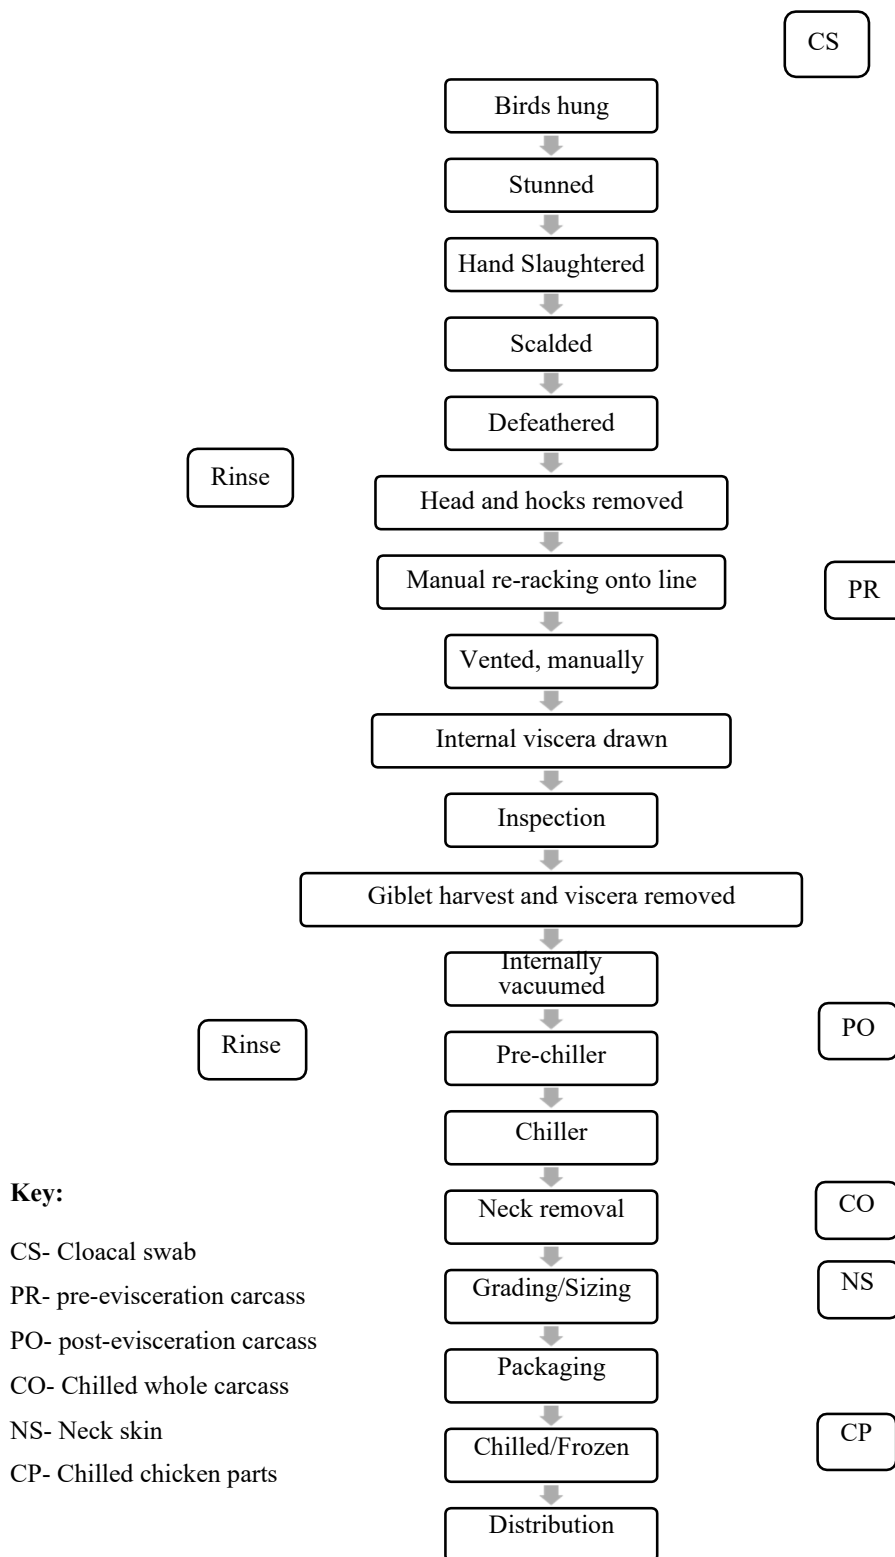

**Supplementary data S1 A. Flow chart showing processing at Plant A**

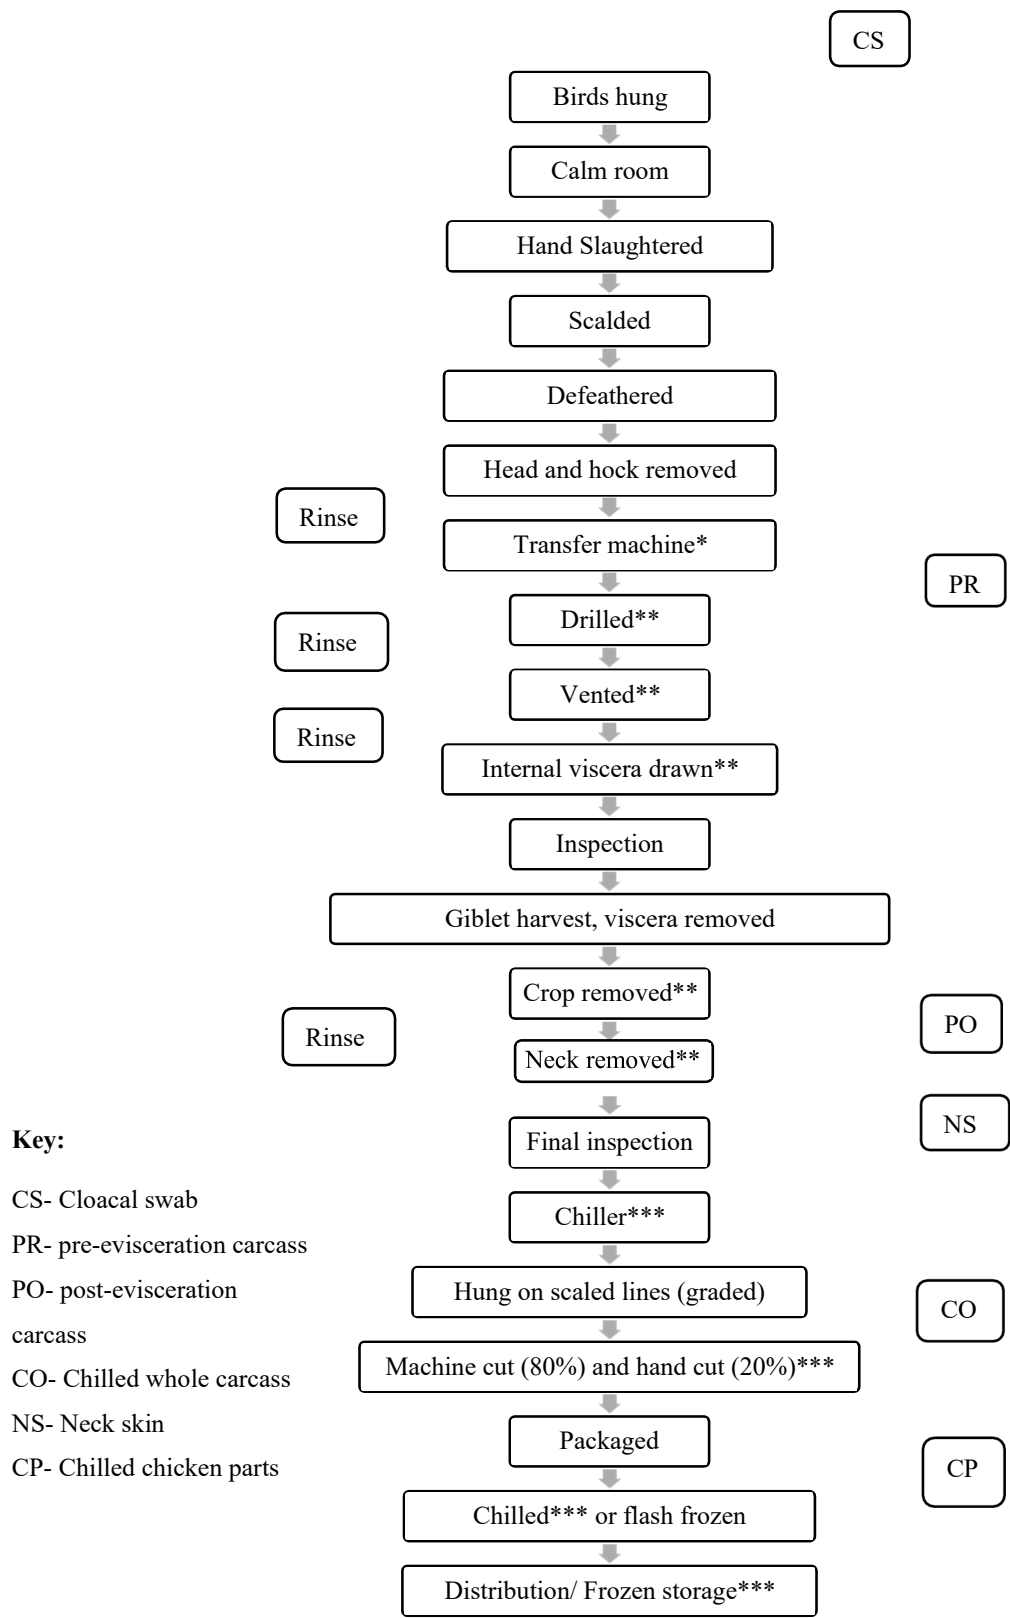

**Supplementary data S1 B. Flow chart showing processing at Plant B.**

\*Slaughter line transferred to evisceration line  
 \*\*Automated/machine controlled process  
 \*\*\*Critical control point

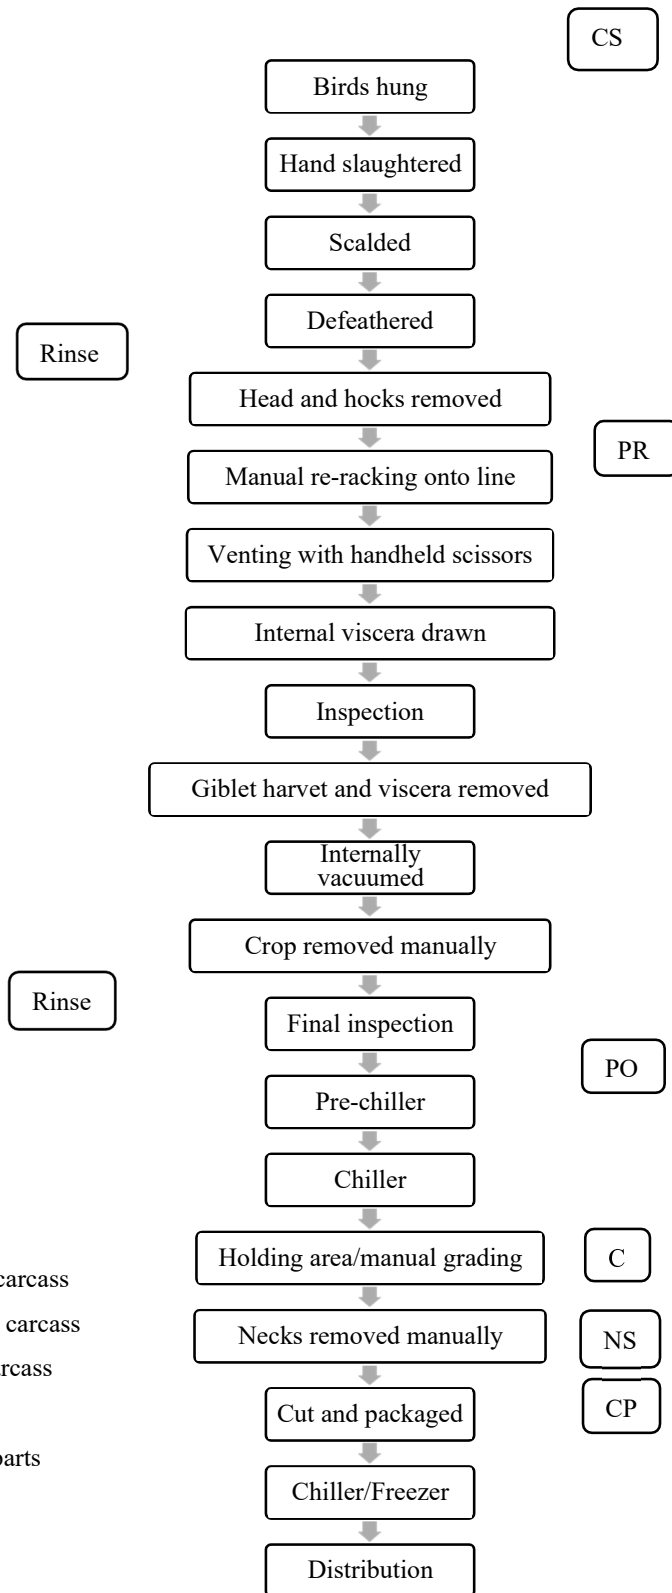

**Key:**

- CS- Cloacal swab
- PR- pre-evisceration carcass
- PO- post-evisceration carcass
- CO- Chilled whole carcass
- NS- Neck skin
- CP- Chilled chicken parts

**Supplementary data S1 C. Flow chart of processing at Plant C**

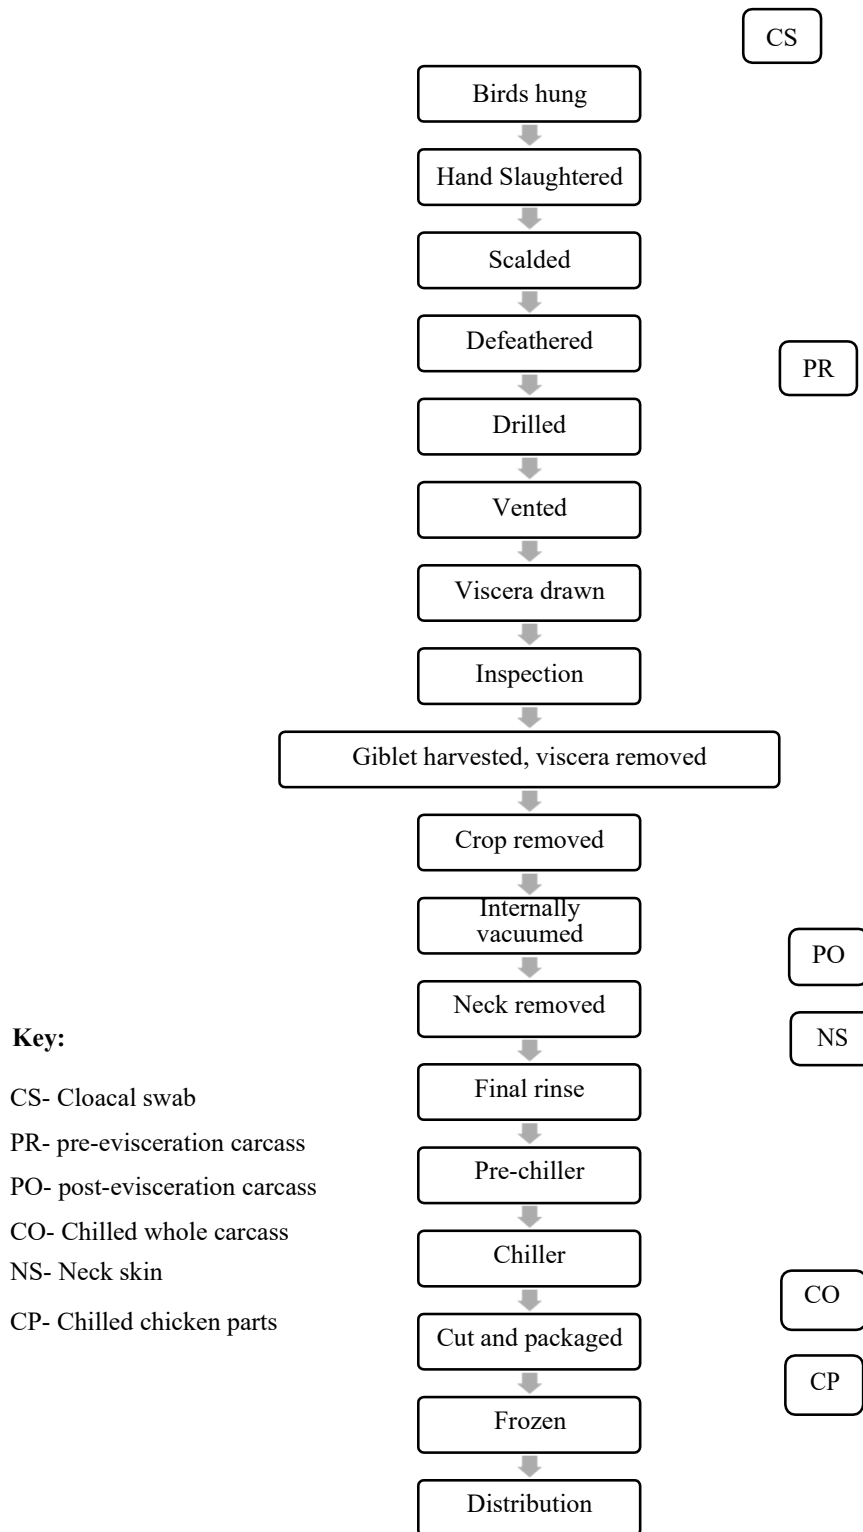

**Supplementary data S1 D. Flow chart showing processing at Plant D**

## Supplementary data S2. Questionnaire administered to processing plants managers

THE UNIVERSITY OF THE WEST INDIES  
FACULTY OF MEDICAL SCIENCES  
SCHOOL OF VETERINARY MEDICINE

### QUESTIONNAIRE

**Prevalence and characteristics of *Salmonella* spp. isolated from broiler processing plants in Trinidad**

**SECTION A: Plant Information**

A1. Date: \_\_\_\_\_ A2. Code: \_\_\_\_\_

A3. GPS: \_\_\_\_\_  
\_\_\_\_\_

---

A4. Name of Abattoir

---

A5. Contact Person

---

A6. Address of Abattoir

---

A7. Telephone Number                      A8. Email Address

A9. How many birds are slaughtered at this processing plant for the week?

1.  500-1000 birds                      2.  1001-5000 birds                      3.  5001-10,000 birds  
 4.  10,001-15,000 birds                      5.  15,001-20,000birds                      6.  20,001-25,000 birds  
 7.  25,001-30,000 birds                      8.  > 30,001 birds                      9.  Other: \_\_\_\_\_

A10. a) How many birds are expected to be slaughtered today (day of sampling)

1.  500-1000 birds                      2.  1001-5000 birds                      3.  5001-10,000 birds  
 4.  10,001-15,000 birds                      5.  15,001-20,000birds                      6.  20,001-25,000 birds  
 7.  25,001-30,000 birds                      8.  > 30,001 birds

A10. b) How many farms are bringing broilers to process today? \_\_\_\_\_

A11. How many days/week do you process broilers?

1.  1-2 days/week                      2.  3-4 days/week                      3.  5 days/week  
 4.  7 days/week

A12. How long has this plant been in operation?

---

A13. Do you export the final product? 1  Yes    2  No

A14. If Yes,

| 1. Country exported too | 2. Product/s exported (whole or parts) | 3. Frequency of exports/shipment |
|-------------------------|----------------------------------------|----------------------------------|
| a.                      |                                        |                                  |
| b.                      |                                        |                                  |
| c.                      |                                        |                                  |
| d.                      |                                        |                                  |

|    |  |  |
|----|--|--|
| e. |  |  |
| f. |  |  |

**SECTION B: Operations**

B1. List the names of farms supplying broilers to the plant and quantity supplied today (Tick farm where cloacal swabs taken from)

| Visit # | Name of Broiler Farm | Location of farm | Quantity supplied today |
|---------|----------------------|------------------|-------------------------|
| 1)      |                      |                  |                         |
| 2)      |                      |                  |                         |
| 3)      |                      |                  |                         |
| 4)      |                      |                  |                         |
|         |                      |                  |                         |
|         |                      |                  |                         |

B2. How many workers are directly involved in the processing operation i.e. handling of the carcass in all shifts?

1.  1-25      2.  26-50      3.  51-75      4.  75-100  
5.  101-125      6.  126-150      7.  151-175      8.  176-200  
9.  201-225      10.  226 or over

B3. How many workers are indirectly (overhead) involved in the processing operation?

1.  1-25      2.  26-50      3.  51-75      4.  75-100  
5.  101-125      6.  126-150      7.  151-175      8.  176-200  
9.  201-225      10.  226 or over

B4. How long is the waiting period between arrival of birds and slaughter?

1.  15-30 mins      2.  30-45 mins      3.  45-60 mins  
4.  > 60 min (1 h)

B5. Are there any measures in place to reduce stress in birds on arrival?

1.  Covered area      2.  High ceiling      3.  Fans      4.  Water spray  
5.  Others (mention) \_\_\_\_\_

B6. What is the average mortality/death rate (%) of broilers on arrival at plant i.e. Of the total number of birds brought to the plant daily, how many arrived dead?

\_\_\_\_\_

B7. If birds from a farm appear to be diseased, how does this affect its processing?

1.  Proceed as normal      3.  Process as last batch for the day  
2.  Reject      4.  Other (specify): \_\_\_\_\_  
\_\_\_\_\_

B8. Please list key steps in the operation.

| Location     | Temperature | Time spent here | Outflow rate/hr | Agents/chemicals added | Concentrations maintained |
|--------------|-------------|-----------------|-----------------|------------------------|---------------------------|
| Pre- chiller |             |                 |                 |                        |                           |
| Chiller      |             |                 |                 |                        |                           |

**SECTION C: Sanitary Practices/Protocols employed**

C1. How do you dispose of the faecal material?

---



---

C2. How do you dispose of the offal?

---



---

C3. How do you dispose of the liquid/effluent waste?

---



---

C4. How do you dispose of dead carcasses pre-slaughter?

---



---

C5. Is the liquid waste treated before release into public waterways?    1.  Yes    2.  No

C6. If yes, state chemicals/processed used.

|   |  |
|---|--|
| 1 |  |
| 2 |  |
| 3 |  |
| 4 |  |
| 5 |  |
| 6 |  |

C7. How often is quality control (QC)- bacterial contamination analysis performed?

1.  Everyday    2.  Every other day    3.  3-4 times a week

4.  Others (specify) \_\_\_\_\_

C8. List the types of samples tested for QC?

1. \_\_\_\_\_
2. \_\_\_\_\_
3. \_\_\_\_\_
4. \_\_\_\_\_
5. \_\_\_\_\_
6. \_\_\_\_\_
7. \_\_\_\_\_

C9. Which bacteria do QC officials focus on?

1. \_\_\_\_\_
2. \_\_\_\_\_

3. \_\_\_\_\_
4. \_\_\_\_\_
5. \_\_\_\_\_
6. \_\_\_\_\_
7. \_\_\_\_\_

C10. What manual or method is used for detection of *Salmonella*?

\_\_\_\_\_

C11. If *Salmonella*/other zoonotic bacterium found to be present on final product, state protocol.

\_\_\_\_\_  
 \_\_\_\_\_

C12. Are labels of final products tagged using an identification system eg. Barcode?

1. Yes
2.  No

C13. If Yes, based on what criteria? E.g. Farm/batch/day processed?

\_\_\_\_\_

C14. How often is general decontamination of processing equipment done?

1.  Between batches
2.  Every other batch
3.  Other(state): \_\_\_\_\_

C15. What equipment are included in general decontamination process? If not all equipment coming into contact with carcasses/effluents of processing, state which are excluded.

1.  All
2.  Some: a. \_\_\_\_\_  
 b. \_\_\_\_\_  
 c. \_\_\_\_\_  
 d. \_\_\_\_\_  
 e. \_\_\_\_\_  
 f. \_\_\_\_\_

C16. What agents are used for general decontamination? State in order of usage

1. \_\_\_\_\_
2. \_\_\_\_\_
3. \_\_\_\_\_
4. \_\_\_\_\_
5. \_\_\_\_\_

C17. How often is a thorough decontamination done?

1.  Overnight
2.  Every other day
3.  Once a week
4.  Twice a week

C18. What equipment are included in the thorough decontamination process? If not all equipment coming into contact with carcasses/effluents of processing, state which are excluded.

1.  All
2.  Some: a. \_\_\_\_\_  
 b. \_\_\_\_\_  
 c. \_\_\_\_\_  
 d. \_\_\_\_\_  
 e. \_\_\_\_\_



f. \_\_\_\_\_

C19. What agents are used for the thorough decontamination? State in order of usage

1. \_\_\_\_\_
2. \_\_\_\_\_
3. \_\_\_\_\_
4. \_\_\_\_\_
5. \_\_\_\_\_

C20. What is the source of water used during processing? ie. Water coming into contact with carcasses e.g. Spraying of carcasses/use in chilled water bath.

---



---

C21. Do you treat your water in-house?

1.  Yes      2.  No

C22. If yes, what chemicals and concentrations are used?

|   | Agent | Concentration used |
|---|-------|--------------------|
| 1 |       |                    |
| 2 |       |                    |
| 3 |       |                    |
| 4 |       |                    |
| 5 |       |                    |

**SECTION D: Protocols employed**

D1. Are workers colour coded (color of coverall) based on the area that they are working? ie Dirty vs clean areas

1.  Yes      2.  No

D2. If yes, how many areas are selective and which areas?

|   |  |
|---|--|
| 1 |  |
| 2 |  |
| 3 |  |
| 4 |  |
| 5 |  |
| 6 |  |

D3. Attire of workers handling birds/carcasses:

| Location                     | Aprons | Hair net | Gloves |  |  |  |
|------------------------------|--------|----------|--------|--|--|--|
| Pre slaughter                |        |          |        |  |  |  |
| Initial slaughter/processing |        |          |        |  |  |  |
| Final processing             |        |          |        |  |  |  |
|                              |        |          |        |  |  |  |
|                              |        |          |        |  |  |  |

**SECTION E: Products sold to the public**

E1. What 'raw' products are made available to consumers? (Whole carcass, parts) Please list.

|   |  |
|---|--|
| 1 |  |
| 2 |  |
| 3 |  |

|    |  |
|----|--|
| 4  |  |
| 5  |  |
| 6  |  |
| 7  |  |
| 8  |  |
| 9  |  |
| 10 |  |
| 11 |  |
| 12 |  |
| 13 |  |
| 14 |  |

E2. What further-processing products (cooked) are sold to the public?

|   |  |
|---|--|
| 1 |  |
| 2 |  |
| 3 |  |
| 4 |  |
| 5 |  |
| 6 |  |
| 7 |  |
| 8 |  |
| 9 |  |

E3. Are broilers the only specie processed in this plant? If No, state other species processed

1.  Yes 2.  No List: \_\_\_\_\_

**THANK YOU FOR YOUR ASSISTANCE**
